# Supplementary material for: Counterion-controlled synthesis of multifunctional iron cobalt mixed oxide laminar superstructures
Source: Royal Society of Chemistry journal article supplement (doi:10.1039/d2nj00412g), 2022-01-01
Supplement: d2nj00412g1.pdf [file d2nj00412g1.pdf]

## Supporting Information

### Counterion Controlled Synthesis of Multifunctional Iron Cobalt Mixed Oxides Laminar Superstructures

Nureena Kanwal,<sup>a</sup> Bilal Akram,<sup>b</sup> Chaudry Sajed Saraj,<sup>c,d</sup> Khalil Ahmad,<sup>a</sup> Shamraiz Hussain Talib<sup>e</sup> and Hafiz Muhammad Asif<sup>f</sup>

#### Experimental methodology

##### Synthesis of FeCo mixed oxide laminar superstructures (FCLS)

In a typical synthesis, a solution was prepared by adding 1ml of oleic acid (OA) and 0.05g of octadecyl amine (ODA) into 3ml of n-hexane. Another solution was prepared by dissolving 1.41g of cobalt sulphate and 1.39g of iron sulphate in 7 ml of distilled water. Both solutions (solution of OA+ODA and of salts) were mixed and stirred for 15min. The resulting solution was being kept in the oven at 80°C for 12 hours. The product was separated and purified by centrifugation using ethanol and cyclohexane. The obtained mixed oxide laminar superstructures were dried in an oven and subjected for characterization and catalysis.

Similar synthetic strategy with different metals precursors was used to obtain different nanostructures. For instance, use of acetate precursor of both iron and cobalt leads to nanoclusters and nanosheets were obtained using chloride precursors of both the metals.

##### Characterization of Materials.

The structural characterizations of prepared samples were done by using transmission electron microscopy (TEM) (Hitachi, H-800; operated at 200kV), and X-ray diffraction (Rigaku, Smartlab; operated at 40kV and 200mA, Cu K $\alpha$  source). Energy Dispersive X-ray spectroscopy coupled with electron microscopy (EDX) was employed to determine the elemental composition of the catalyst. The surface functional groups and successful preparation of target material was determined by applying Fourier transform infrared (FTIR) analysis using FTIR spectrometer (FTIR-2000, Bruker). The photo luminance (PL) and diffused reflectance spectra were recorded on a UV–Vis spectrophotometer (Shimadzu-1601). Thermogravimetric analysis (TGA) was performed with Mettler Toledo TGA/SDTA851e at a heating rate of 10 °C min<sup>-1</sup> from room temperature to 700 °C under air flow. Brunauer-Emmett-Teller (BET) surface area was performed using a Quadrasorb SI-MP instrument. X-ray photoelectron spectroscopy (XPS) was performed on a scanning X-ray microprobe (Quantera SXM, ULVAC-PHI. INC) operated at 250 kV, 55 eV with monochromated Al K $\alpha$  radiation.

### **Photocatalytic activity of FeCo mixed oxide nanostructures**

Photocatalytic activity of FCLS and FCNPs was investigated using one of the most common textile dyes, methylene blue for degradation purpose. Catalytic performance was estimated by taking 50ml of known concentration of methylene blue (5ppm). 50mg of FeCo based nano catalyst was added to 50ml of dye solution which correspond to 1mg/ml of solution. The reaction was initiated by the addition of 1ml of hydrogen peroxide as oxidant into 50ml dye solution. To attain the adsorption and desorption equilibrium between catalyst and dye the solution was kept in the dark for 30 minutes. After dark treatment catalyst containing dye solution was kept on stirring under light irradiation. The progress of MB degradation was observed with successive time interval of 3 minutes and absorbance was measured at 663nm. Catalyst showed appreciable degradation activity for MB. While analysing the dye concentration syringe was used to take specific volume of solution to minimize catalyst injection. To analyse the recyclability and steadiness of catalyst, the catalyst was removed from dye solution after completion of experiment. Catalyst was separated using centrifuge machine, washed twice with water and twice with ethanol. Then oven dried and reused for stability test.

### **Electrochemical Measurements**

Catalyst's ink of each sample was prepared by first ultrasonic dispersion of 5 mg of powder sample into 0.5 ml of water/ethanol solution (1:1, v/v) followed by the addition of 15  $\mu$ l of 5% Nafion solution into mixture as adhesive and ultrasonication for 1 hour.

The working electrode (WE) was fabricated by deposition of 10  $\mu$ l of prepared ink on a carbon-cloth electrode (area=1x1 cm<sup>2</sup>) followed by drying at 25°C temperature.

Electrochemical measurements were performed on BioLogic-VMP3 multichannel workstation with a three-electrode system, where a Pt-wire, a catalyst loaded carbon-cloth electrode, and a saturated calomel electrode (SCE) were used as counter, working and reference electrodes, respectively. An Aqueous solution of 1.0 M KOH were used as alkaline electrolytes for electrochemical tests. Linear sweep voltammetry (LSV) curves were measured by sweeping voltage in the range of -0.1 to 0.8 V vs SCE electrode with the scan rate of 10 mVs<sup>-1</sup>. Expression  $E_{RHE} = E_{SCE} + E_{SCE}^0 + 0.0592 * pH$ , where  $E_{SCE}^0 = 0.242 V$ , were used to convert V vs. SCE to V vs. reversible hydrogen electrode (RHE), all data were iR corrected. WE were first prestabilized in the electrolyte (1 MKOH) using 50 scans of cyclic voltammetry (CV) at 50 mV/s before performing LSV tests. Electrochemical impedance spectra (EIS) were recorded with the biasing of working electrode at and 0.5 V (OER) (vs SCE) and superimposing a small alternating voltage of 10 mV over the frequency range of 1x10<sup>-2</sup> Hz to 1x10<sup>6</sup> Hz. For double layer capacitance (C<sub>dl</sub>) and electrochemical active surface area (ECSA), the small scan

CV were recorded in non-faradaic region from 0.1 to 0.26 V vs. SCE with different scan rates 10 mV/s, 20 mV/s, 40 mV/s, 60 mV/s, 80 mV/s, and 100 mV/s.

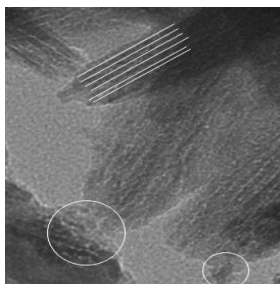

**Figure S1.** Zoom in TEM image clearly reveals the lamellar structure as indicated in schematic in the main MS. We have assumed that these laminar structures have been developed from the ultrafine nanoparticles. This proposed growth hypothesis has been evidenced by the existence of some aggregated nanoparticles as encircled in this TEM image. We assumed that these nanoparticles assembled into laminar structures and few particles remain unassembled in the product.

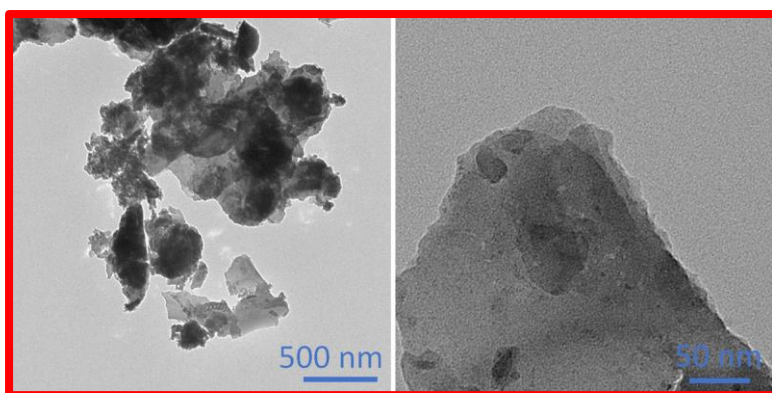

**Figure S2.** TEM image of the product obtained using chloride precursors of both metals

**Scheme 1.** The mechanistic details of the formation of mixed oxides is given below.

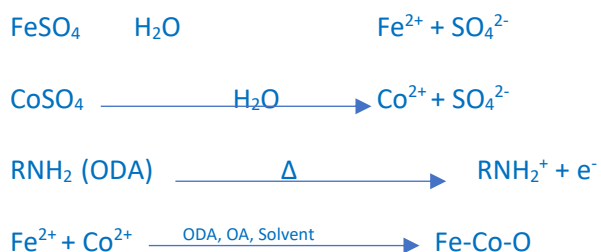

ODA can offer electrons as indicated above. So, the ODA solvent has some reducing power and the ability to attract electrons of metal ions determines the products. Since Fe and Co cannot attract electrons from ODA and thus mixed oxide is the product.

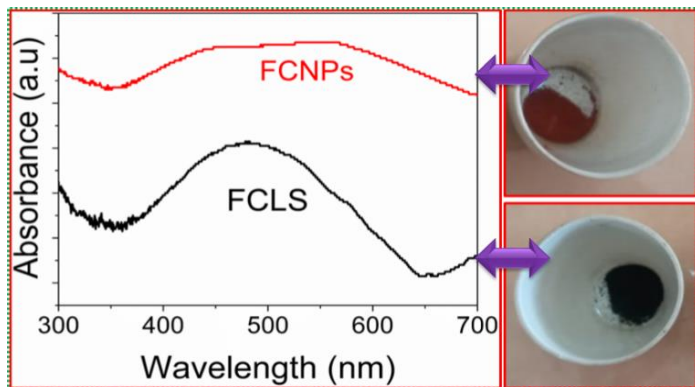

**Figure S3.** UV-Vis absorption spectrum and digital photographs of FCLS and FCNPs.

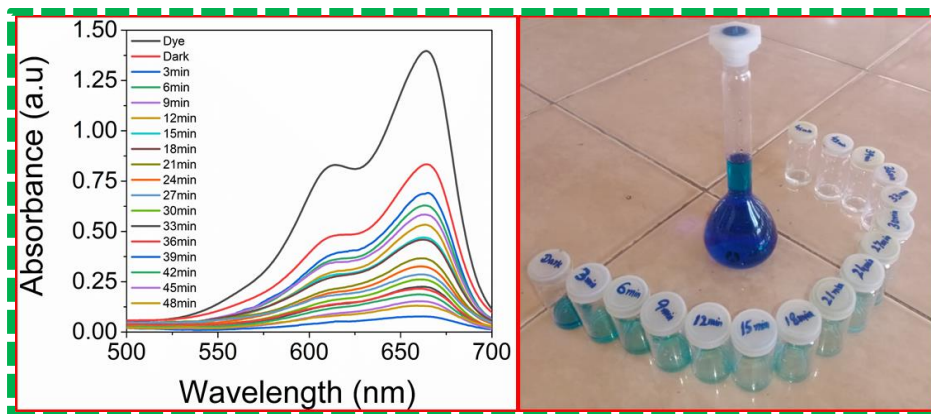

**Figure S4.** Photocatalytic performance of FCNPs: absorption spectrum of MB degradation and pictorial view of decolorization of MB

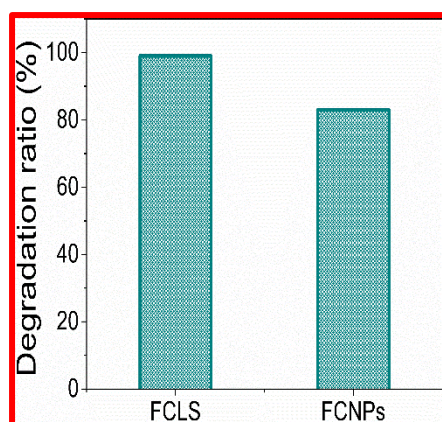

**Figure S5.** Degradation ratio after 30min irradiation over FCLS and FCNPs

| FCLS                         |                           | FCNPs                        |                          |
|------------------------------|---------------------------|------------------------------|--------------------------|
| BET summary                  |                           | BET summary                  |                          |
| Slope =                      | 25.051                    | Slope =                      | 42.180                   |
| Intercept =                  | 2.539e-01                 | Intercept =                  | 1.502e+00                |
| Correlation coefficient, r = | 0.999968                  | Correlation coefficient, r = | 0.999949                 |
| C constant =                 | 99.660                    | C constant =                 | 29.087                   |
| Surface Area =               | 137.623 m <sup>2</sup> /g | Surface Area =               | 79.724 m <sup>2</sup> /g |

**Figure S6.** BET summary of both FCLS and FCNPs.

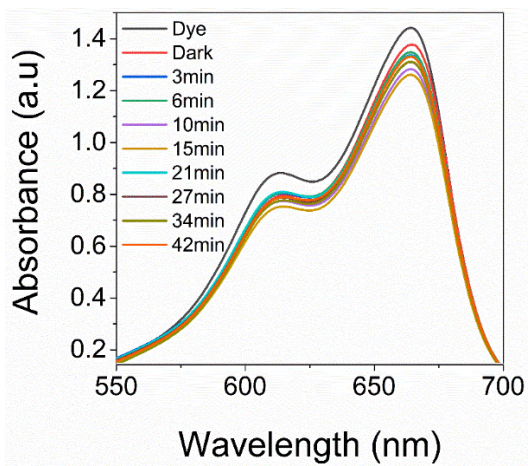

**Figure S7.** Photocatalytic degradation of MB using FCLS without H<sub>2</sub>O<sub>2</sub>

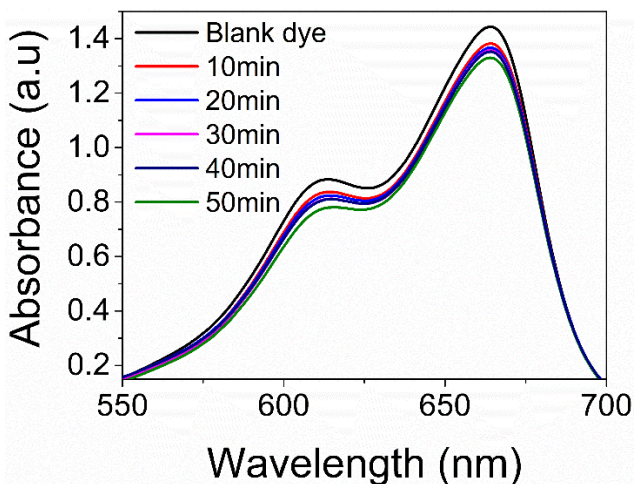

**Figure S8.** Photocatalytic degradation of MB using H<sub>2</sub>O<sub>2</sub> without FCLS

**Table S1.** Different overpotential values for all the as-synthesized catalysts

| <b>Materials</b> | <b><math>\eta^1</math><br/>(mV)</b> | <b><math>\eta^{10}</math><br/>(mV)</b> | <b><math>\eta^{50}</math><br/>(mV)</b> | <b><math>\eta^{100}</math><br/>(mV)</b> |
|------------------|-------------------------------------|----------------------------------------|----------------------------------------|-----------------------------------------|
| CC               | 416                                 | >800                                   |                                        |                                         |
| FCNPs            | 328                                 | 378                                    | 440                                    | 484                                     |
| FCLS             | 283                                 | 330                                    | 380                                    | 412                                     |
| IrO <sub>2</sub> | 159                                 | 291                                    | 374                                    | 431                                     |

**Table S2.** The Tafel slopes and other electrochemical parameters for all the as-synthesized catalysts

| <b>Materials</b> | <b><math>\eta^1</math><br/>(mV)</b> | <b><math>\eta^{10}</math><br/>(mV)</b> | <b>EIS<br/><math>R_{ct}</math><br/>(<math>\Omega</math>)</b> | <b><math>R_s</math><br/>(<math>\Omega</math>)</b> | <b><math>C_{dl}</math><br/>(mFcm<sup>-2</sup>)</b> | <b>Tafel slope<br/>(mVdec<sup>-1</sup>)</b> | <b><math>J^{450}</math><br/>(mAcm<sup>-2</sup>)</b> |
|------------------|-------------------------------------|----------------------------------------|--------------------------------------------------------------|---------------------------------------------------|----------------------------------------------------|---------------------------------------------|-----------------------------------------------------|
| CC               | 416                                 | >800                                   | 43997                                                        | 2.7                                               | 0.2                                                | 70                                          | -                                                   |
| FCNPs            | 328                                 | 378                                    | 3.48                                                         | 2.6                                               | 4.2                                                | 47                                          | 60                                                  |
| FCLS             | 283                                 | 330                                    | 2.49                                                         | 2.19                                              | 30.6                                               | 45                                          | 175                                                 |
| IrO <sub>2</sub> | 159                                 | 291                                    |                                                              |                                                   |                                                    |                                             | 127                                                 |

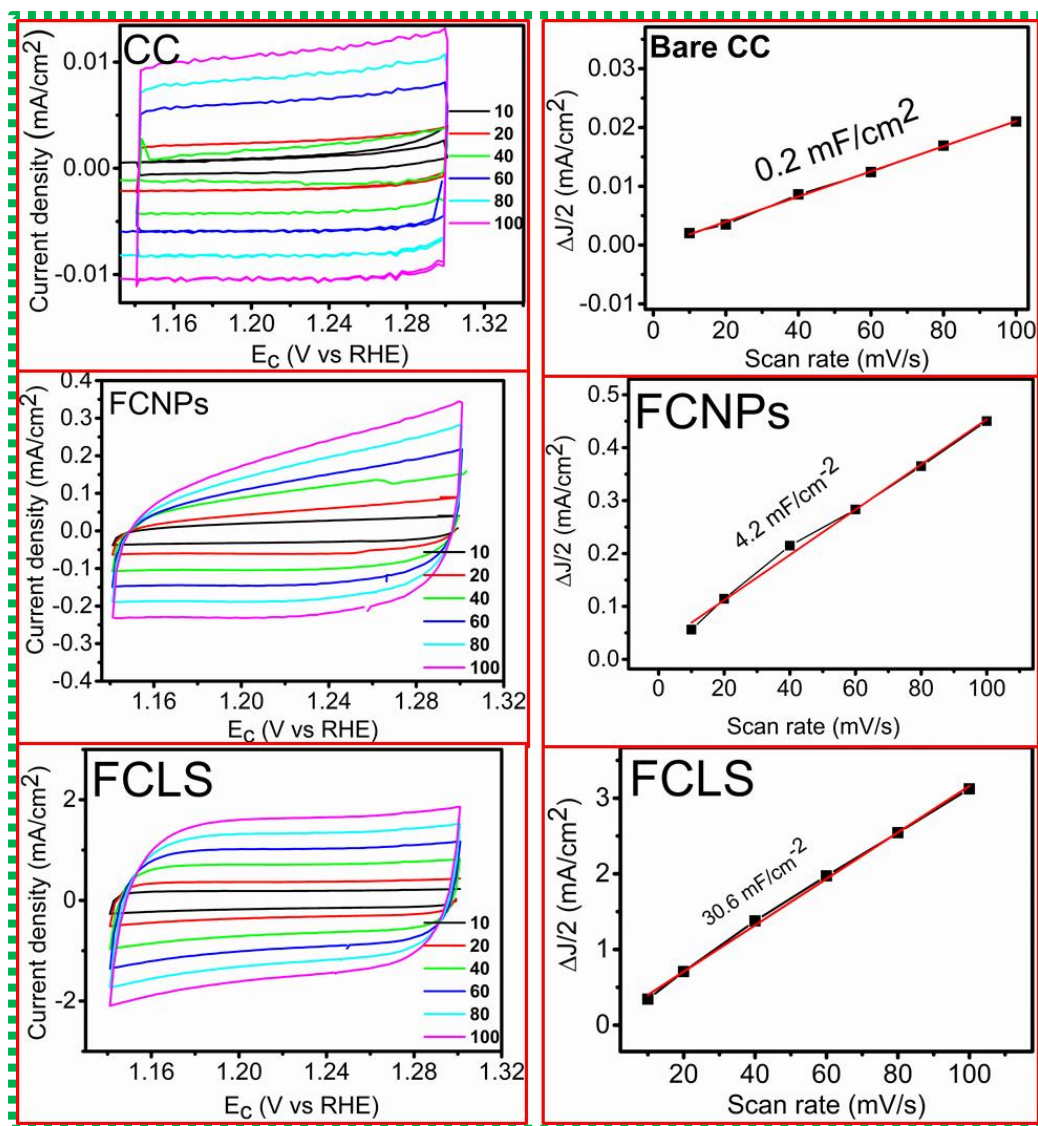

Figure S9. CV curves and Cdl of different samples

Table S3. The ECSA of various catalysts

| Materials | Cdl<br>(mFcm <sup>-2</sup> ) | C(CC)<br>(mFcm <sup>-2</sup> ) | ECSA<br>Cdl/C(NF)<br>cm <sup>2</sup> |
|-----------|------------------------------|--------------------------------|--------------------------------------|
| CC        | 0.2                          | 0.2                            | 1                                    |
| FCNPs     | 4.2                          | 0.2                            | 21                                   |
| FCLS      | 30.6                         | 0.2                            | 153                                  |

| Materials                                                        | preparation method                           | Electrolyte | Overpotential @10 mAcm <sup>-2</sup> | Ref.             |
|------------------------------------------------------------------|----------------------------------------------|-------------|--------------------------------------|------------------|
| Sea-urchin structured Co-Fe-P                                    | Chemical method                              | 1 M KOH     | 370 mV                               | <sup>1</sup>     |
| CoFeO <sub>x</sub>                                               | Electrodeposition                            | 1 M NaOH    | 370 mV                               | <sup>2</sup>     |
| Co/Fe oxide                                                      | Hydrothermal pathway                         | 0.1M KOH    | 486 mV                               | <sup>3</sup>     |
| CoFe <sub>2</sub> O <sub>4</sub>                                 | Electrospinning and thermal treatment        | 0.1M KOH    | 370 mV                               | <sup>4</sup>     |
| FeCo@NC                                                          | Electrospinning followed by pyrolysis        | 1M KOH      | 370 mV                               | <sup>5</sup>     |
| CoFe-LDH/                                                        | Precipitation                                | 1M KOH      | 331 mV                               | <sup>6</sup>     |
| FeCo/CP                                                          | Co-precipitation followed by rapid pyrolysis | 1M KOH      | 319 mV                               | <sup>7</sup>     |
| Fe-Co <sub>3</sub> O <sub>4</sub>                                | Hydrothermal method                          | 1M KOH      | 380 mV                               | <sup>8</sup>     |
| Fe-Doped NiCo <sub>2</sub> O <sub>4</sub>                        | Hydrothermal method                          | 1M KOH      | 350 mV                               | <sup>9</sup>     |
| Fe-Doped CoOOH/G                                                 | Chemical synthesis                           | 1M KOH      | 330 mV                               | <sup>10</sup>    |
| Co <sub>3</sub> O <sub>4</sub> /NiCo <sub>2</sub> O <sub>4</sub> | Chemical synthesis                           | 1M KOH      | 340 mV                               | <sup>11</sup>    |
| FCLS                                                             | Solution phase synthesis                     | 1M KOH      | 330 mV                               | <i>This work</i> |
| FCNPs                                                            | Solution phase synthesis                     | 1M KOH      | 378 mV                               | <i>This work</i> |

**Table S4.** Comparison of OER performance for various electrocatalysts in alkaline condition.

#### References:

1. A. Mendoza-Garcia, D. Su and S. Sun, *Nanoscale*, 2016, **8**, 3244-3247.
2. C. C. McCrory, S. Jung, J. C. Peters and T. F. Jaramillo, *J. Am. Chem. Soc.*, 2013, **135**, 16977-16987.
3. T. Grewe, X. Deng and H. Tüysüz, *Chem. Mater.*, 2014, **26**, 3162-3168.
4. M. Li, Y. Xiong, X. Liu, X. Bo, Y. Zhang, C. Han and L. Guo, *Nanoscale*, 2015, **7**, 8920-8930.
5. M. Li, T. Liu, X. Bo, M. Zhou and L. Guo, *Journal of Materials Chemistry A*, 2017, **5**, 5413-5425.
6. B. Zhang, X. Zheng, O. Voznyy, R. Comin, M. Bajdich, M. García-Melchor, L. Han, J. Xu, M. Liu and L. Zheng, *Science*, 2016, **352**, 333-337.
7. H. Zhang, J. Zheng, Y. Chao, K. Zhang and Z. Zhu, *New J. Chem.*, 2018, **42**, 7254-7261.
8. C. Xiao, X. Lu and C. Zhao, *Chem. Commun.*, 2014, **50**, 10122-10125.
9. K.-L. Yan, X. Shang, Z. Li, B. Dong, X. Li, W.-K. Gao, J.-Q. Chi, Y.-M. Chai and C.-G. Liu, *Appl. Surf. Sci.*, 2017, **416**, 371-378.



10. X. Han, C. Yu, S. Zhou, C. Zhao, H. Huang, J. Yang, Z. Liu, J. Zhao and J. Qiu, *Advanced Energy Materials*, 2017, **7**, 1602148.
11. H. Hu, B. Guan, B. Xia and X. W. Lou, *J. Am. Chem. Soc.*, 2015, **137**, 5590-5595.
